# Supplementary material for: The importance of conserved amino acids in heme-based globin-coupled diguanylate cyclases
Source: PubMed Central journal article supplement (PMC5549716; doi:10.1371/journal.pone.0182782), 2017-08-08

## Supporting Information – S1 File

---

---

**Table A. Primers used for cloning *EcGReg* and *BpeGReg* in pTrc99A.**

| <b>Primer name</b>       | <b>Primer sequence (5'-3')</b> |
|--------------------------|--------------------------------|
| <i>EcGReg</i> SacI top   | AAGAGCTCATGGAGATGTATTTTAAAAG   |
| <i>EcGReg</i> BamHI bot  | AAGGATCCCTAAAGACTGGCTTTCCAG    |
| <i>BpeGReg</i> SacI top  | AAGAGCTCTTGAAGCCTTCGCCTGAAATC  |
| <i>BpeGReg</i> BamHI bot | AAGGATCCCTAGTGCTGGCCGGACTG     |

**Table B. Primers used for the construction of *EcGReg* mutants and truncated *EcGReg*.**

| <b>Primer Name</b>                       | <b>Primer Sequence 5'-3'</b>             |
|------------------------------------------|------------------------------------------|
| <b>Primers for globin domain mutants</b> |                                          |
| <i>EcGReg</i> F42A mutF                  | CATTATCTGAGTATCGAGGCCTATCGAATTGTCCGC     |
| <i>EcGReg</i> F42A mutR                  | GCGGACAATTCGATAGGCCTCGATACTCAGATAATG     |
| <i>EcGReg</i> Y43A mutF                  | CTGAGTATCGAGTTTGCCCGAATTGTCCGCATCG       |
| <i>EcGReg</i> Y43A mutR                  | CGATGCGGACAATTCGGGCAAACCTCGATACTCAG      |
| <i>EcGReg</i> A68T mutF                  | GCGGCAGTTGAAGAGTACCATGGAACGCTGGATTATTAAC |
| <i>EcGReg</i> A68T mutR                  | GTTAATAATCCAGCGTTCATGGTACTCTTCAACTGCCGC  |
| <i>EcGReg</i> M69A mutF                  | CAGTTGAAGAGTGC GGCCGAACGCTGGATTATTAAC    |
| <i>EcGReg</i> M69A mutR                  | GTTAATAATCCAGCGTTCGGCCGCACTCTTCAACTG     |
| <b>Primers for DGC domain mutants</b>    |                                          |
| <i>EcGReg</i> G374A mutF                 | GATTATGTTTTCCGCTACGCCGGCGATGAATTTATCATTG |
| <i>EcGReg</i> G374A mutR                 | CAATGATAAATTCATCGCCGGCGTAGCGGAAAACATAATC |
| <i>EcGReg</i> G375A mutF                 | GTTTTCCGCTACGGGGCCGATGAATTTATCATTG       |
| <i>EcGReg</i> G375A mutR                 | CAATGATAAATTCATCGGCCCCGTAGCGGAAAAC       |
| <i>EcGReg</i> D376A mutF                 | GTTTTCCGCTACGGGGGCGCCGAATTTATCATTGTTTTG  |
| <i>EcGReg</i> D376A mutR                 | CAAAACAATGATAAATTCGGGCGCCCCGTAGCGGAAAAC  |
| <i>EcGReg</i> E377A mutF                 | CCGCTACGGGGGCGATGCCTTTATCATTGTTTTGAC     |
| <i>EcGReg</i> E377A mutR                 | GTCAAAACAATGATAAAGGCATCGCCCCGTAGCGG      |
| <i>EcGReg</i> F378A mutF                 | CTACGGGGGCGATGAAGCCATCATTGTTTTGACTG      |
| <i>EcGReg</i> F378A mutR                 | CAGTCAAAACAATGATGGCTTCATCGCCCCGTAG       |
| <i>EcGReg</i> L300A mutF                 | GTCGGTATGGATGTAGCCACGAACTTAACC           |
| <i>EcGReg</i> L300A mutR                 | GGTTAAGTAATTTTCGTGGCTACATCCATACCGAC      |
| <i>EcGReg</i> L300D mutF                 | GTCGGTATGGATGTAGACACGAACTTAACC           |
| <i>EcGReg</i> L300D mutR                 | GGTTAAGTAATTTTCGTGTCTACATCCATACCGAC      |
| <i>EcGReg</i> R306A mutF                 | GACGAACTTAACGCCCCGTTTCTACCGACTATC        |
| <i>EcGReg</i> R306A mutR                 | GATAGTCGGTAGGAAACGGGCGTTAAGTAATTCGTC     |
| <i>EcGReg</i> D333A mutF                 | GTCAGTGCTGATTATTGCCGTTGATAAATTCAAAG      |
| <i>EcGReg</i> D333A mutR                 | CTTTGAATTTATCAACGGCAATAATCAGCACTGAC      |
| <i>EcGReg</i> F337A mutF                 | GATTATTGACGTTGATAAAGCCAAAGAGATCAACGATAC  |
| <i>EcGReg</i> F337A mutR                 | GTATCGTTGATCTCTTTGGCTTTATCAACGTCAATAATC  |
| <i>EcGReg</i> K338A mutF                 | GACGTTGATAAATTCGCCGAGATCAACGATACG        |
| <i>EcGReg</i> K338A mutR                 | CGTATCGTTGATCTCGGCGAATTTATCAACGTC        |
| <i>EcGReg</i> N341A mutF                 | GATAAATTCAAAGAGATCGCCGATACGTGGGGCCATAAC  |
| <i>EcGReg</i> N341A mutR                 | GTTATGGCCCCACGTATCGGCGATCTCTTTGAATTTATC  |
| <i>EcGReg</i> D342A mutF                 | GATAAATTCAAAGAGATCAACGCCACGTGGGGCCATAAC  |

|                          |                                         |
|--------------------------|-----------------------------------------|
| <i>EcGReg</i> D342A mutR | GTTATGGCCCCACGTGGCGTTGATCTCTTTGAATTTATC |
| <i>EcGReg</i> D350A mutF | GGCCATAACACTGGTGGCCGAAATTCTGCGTAAAG     |
| <i>EcGReg</i> D350A mutR | CTTTACGCAGAATTTTCGGCACCAGTGTTATGGCC     |
| <i>EcGReg</i> L353A mutF | CACTGGTGATGAAATTGCCCCGTAAAGTCTCTCAGG    |
| <i>EcGReg</i> L353A mutR | CCTGAGAGACTTTACGGGCAATTTTCATCACCAGTG    |
| <i>EcGReg</i> L353D mutF | CACTGGTGATGAAATTGACCGTAAAGTCTCTCAGG     |
| <i>EcGReg</i> L353D mutR | CCTGAGAGACTTTACGGTCAATTTTCATCACCAGTG    |
| <i>EcGReg</i> D368A muF  | CAACGTCCGCAGTAGTGCCCTATGTTTTCCGCTAC     |
| <i>EcGReg</i> D368A mutR | GTAGCGGAAAACATAGGCACTACTGCGGACGTTG      |
| <i>EcGReg</i> D368K mutF | CAACGTCCGCAGTAGTAAATATGTTTTCCGCTAC      |
| <i>EcGReg</i> D368K mutR | GTAGCGGAAAACATATTTACTACTGCGGACGTTG      |
| <i>EcGReg</i> R372A mutF | GTAGTGATTATGTTTTCGCCTACGGGGGCGATG       |
| <i>EcGReg</i> R372A mutR | CATCGCCCCGTAGGCGAAAACATAATCACTAC        |

**Primers for middle domain mutants**

|                          |                                        |
|--------------------------|----------------------------------------|
| <i>EcGReg</i> H223A mutF | GGCCTGTGGTTTAAACGCCAAAGGTCGACATTATTTAG |
| <i>EcGReg</i> H223A mutR | CTAAAATAATGTCGACCTTTGGCGTTAAACCACAGGCC |
| <i>EcGReg</i> K224A mutF | CCTGTGGTTTAAACCATGCCGGTCGACATTATTTAG   |
| <i>EcGReg</i> K224A mutR | CTAAAATAATGTCGACCGGCATGGTTAAACCACAGG   |

**Primers for truncated *EcGReg***

|                                       |                               |
|---------------------------------------|-------------------------------|
| <i>EcGReg</i> 25-end <i>SacI</i> top  | CGGAGCTCGCTAAAGCCGCGGAAATTG   |
| <i>EcGReg</i> 50-end <i>SacI</i> top  | CGGAGCTCCCGCATGCCGAAGAATTC    |
| <i>EcGReg</i> 75-end <i>SacI</i> top  | CGGAGCTCAACGTGCTTTCTGCCAG     |
| <i>EcGReg</i> 100-end <i>SacI</i> top | CGGAGCTCCGCATAGGAATTCCGGTAG   |
| <i>EcGReg</i> 125-end <i>SacI</i> top | CGGAGCTCTTTCGGATTATTCCGCC     |
| <i>EcGReg</i> 154-end <i>SacI</i> top | AAGAGCTCATGGCGTTTACCTTTAGTGAC |
| <i>EcGReg</i> 268-end <i>SacI</i> top | AAGAGCTCATGTTTTTATTACAGATAAG  |

---

**Table C. Primers used for the construction of *BpeGReg* mutants and truncated *BpeGReg*.**

| <b>Primer name</b>                                      | <b>Primer Sequence 5'-3'</b>         |
|---------------------------------------------------------|--------------------------------------|
| <b>Primers for <i>BpeGReg</i> globin domain mutants</b> |                                      |
| <i>BpeGReg</i> F42A mutF                                | GGCGCTGGCCGATTATGCCTACGAGTGCATGCTGG  |
| <i>BpeGReg</i> F42A mutR                                | CCAGCATGCACTCGTAGGCATAATCGGCCAGCGCC  |
| <i>BpeGReg</i> Y43A mutF                                | GCTGGCCGATTATTTTCGCCGAGTGCATGCTGGCCG |
| <i>BpeGReg</i> Y43A mutR                                | CGGCCAGCATGCACTCGGCGAAATAATCGGCCAGC  |
| <i>BpeGReg</i> S68A mutF                                | GACCAAGCTGCATGCCGCCATGCAGGATTGGCTGG  |
| <i>BpeGReg</i> S68A mutR                                | CCAGCCAATCCTGCATGGCGGCATGCAGCTTGGTC  |
| <i>BpeGReg</i> M69A mutF                                | CAAGCTGCATGCCTCCGCCAGGATTGGCTGGAATC  |
| <i>BpeGReg</i> M69A mutR                                | GATTCCAGCCAATCCTGGGCGGAGGCATGCAGCTTG |
| <b>Primers for <i>BpeGReg</i> middle domain mutants</b> |                                      |
| <i>BpeGReg</i> K226A mutF                               | CCTGTGGTTCATCCACGCCGCGGCGCACGCCTTCG  |
| <i>BpeGReg</i> K226A mutR                               | CGAAGGCGTGCGCCGCGGCGTGGATGAACCACAGG  |
| <b>Primers for truncated <i>BpeGReg</i></b>             |                                      |
| <i>BpeGReg</i> 156-475 SacI top                         | AAGAGCTCGCCTACTCGGTGTCGCAC           |
| <i>BpeGReg</i> 267-475 SacI top                         | AAGAGCTCATCCTGCACAGCGTGCGC           |
| <i>BpeGReg</i> 297-475 SacI top                         | AAGAGCTCGATACGCTGACCCGGCTG           |
| <i>BpeGReg</i> 1-155 tga BamHI bot                      | AAGGATCCTCAATGGCACATCATCTCGAC        |
| <i>BpeGReg</i> 1-266 tga BamHI bot                      | AAGGATCCTCAGGCCAGGCGCTGGTCCGGG       |
| <i>BpeGReg</i> 1-296 tga BamHI bot                      | AAGGATCCTCAGCGCCCCGACTCCAGG          |

**Table D. Primers used for expression of truncated *BpeGReg* in pET-3a.**

| <b>Primer name</b>                 | <b>Primer sequence (5'-3')</b>    |
|------------------------------------|-----------------------------------|
| <i>BpeGReg</i> Xa top              | ATCGAGGGAAGGTTGAAGCCTTCGCCTGAAATC |
| Histidine Xa top                   | CACCACCACCACCACCACATCGAGGGAAGG    |
| NdeI histidine top                 | AACATATGCACCACCACCACCACCAC        |
| <i>BpeGReg</i> BamHI bot           | AAGGATCCCTAGTGCTGGCCGGACTG        |
| <i>BpeGReg</i> 1-155 tga BamHI bot | AAGGATCCTCAATGGCACATCATCTCGAC     |
| <i>BpeGReg</i> 1-266 tga BamHI bot | AAGGATCCTCAGGCCAGGCGCTGGTCGGG     |
| <i>BpeGReg</i> 1-296 tga BamHI bot | AAGGATCCTCAGCGCCCCGACTCCAGG       |

**Figure A. Absorption spectra of truncated *BpeGReg* proteins.** a) Wild-type *BpeGReg* (solid red line) showed heme-bound absorption spectra. b) *BpeGReg*<sub>155</sub>, *BpeGReg*<sub>266</sub>, and *BpeGReg*<sub>296</sub> showed heme-bound absorption spectra, similar to that of wild-type *BpeGReg*.

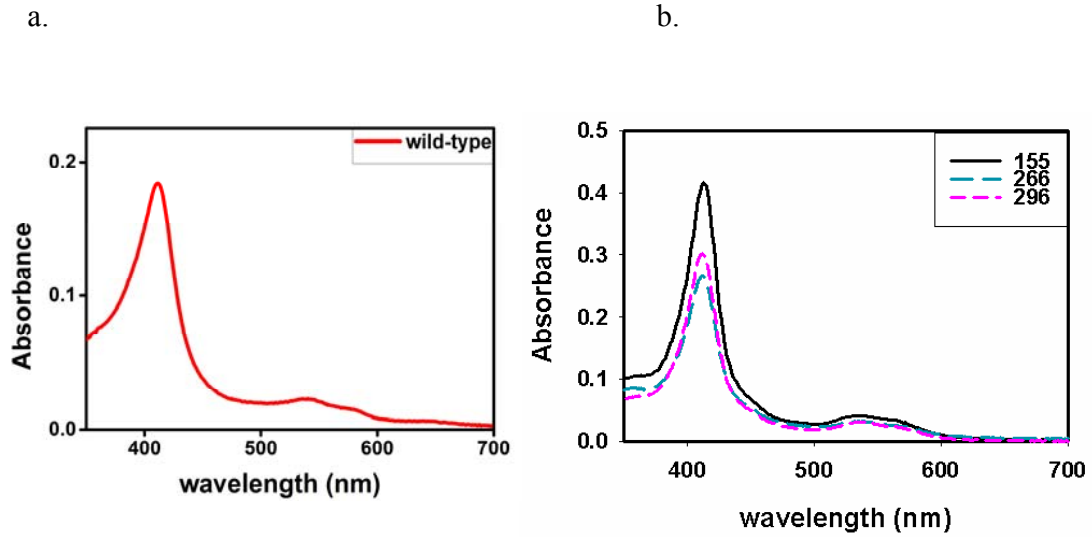

Supplement: pone.0182782.s001.pdf [file pone.0182782.s001.pdf]
